# Supplementary material for: A systematic computational investigation of lithiation-induced structural phase transitions of O-functionalized MXenes
Source: Royal Society of Chemistry journal article supplement (doi:10.1039/d3cp00012e), 2023-01-01
Supplement: d3cp00012e2.pdf [file d3cp00012e2.pdf]

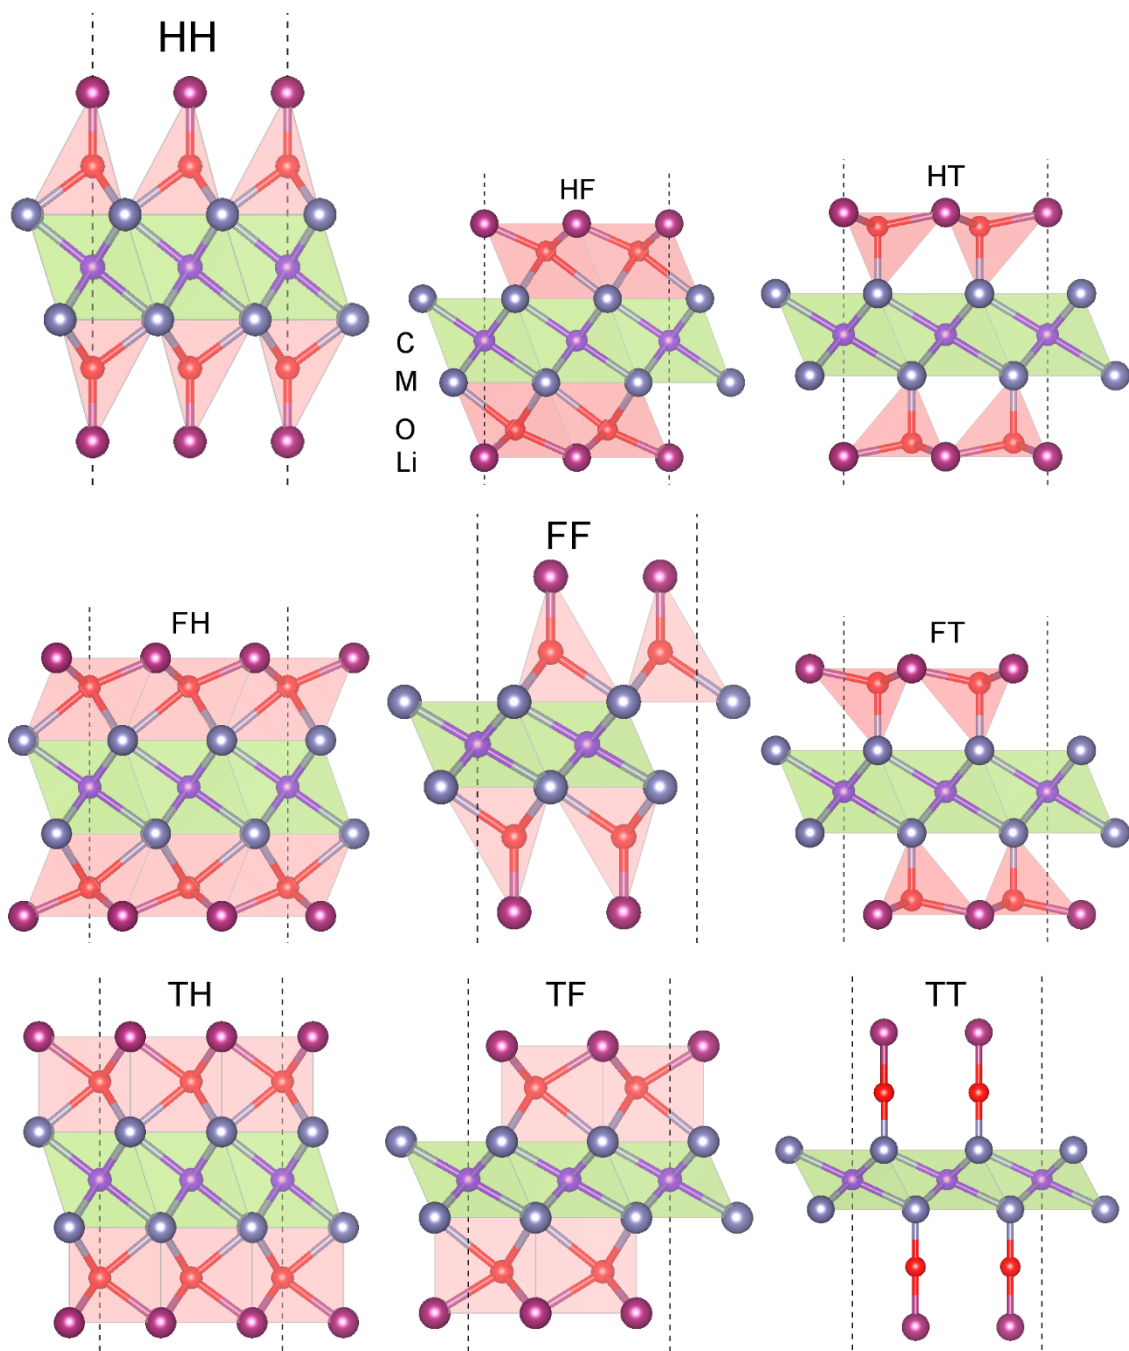

Fig. S1. Nine constructed lithiated  $XY-M_2CO_2Li_2$  configurations

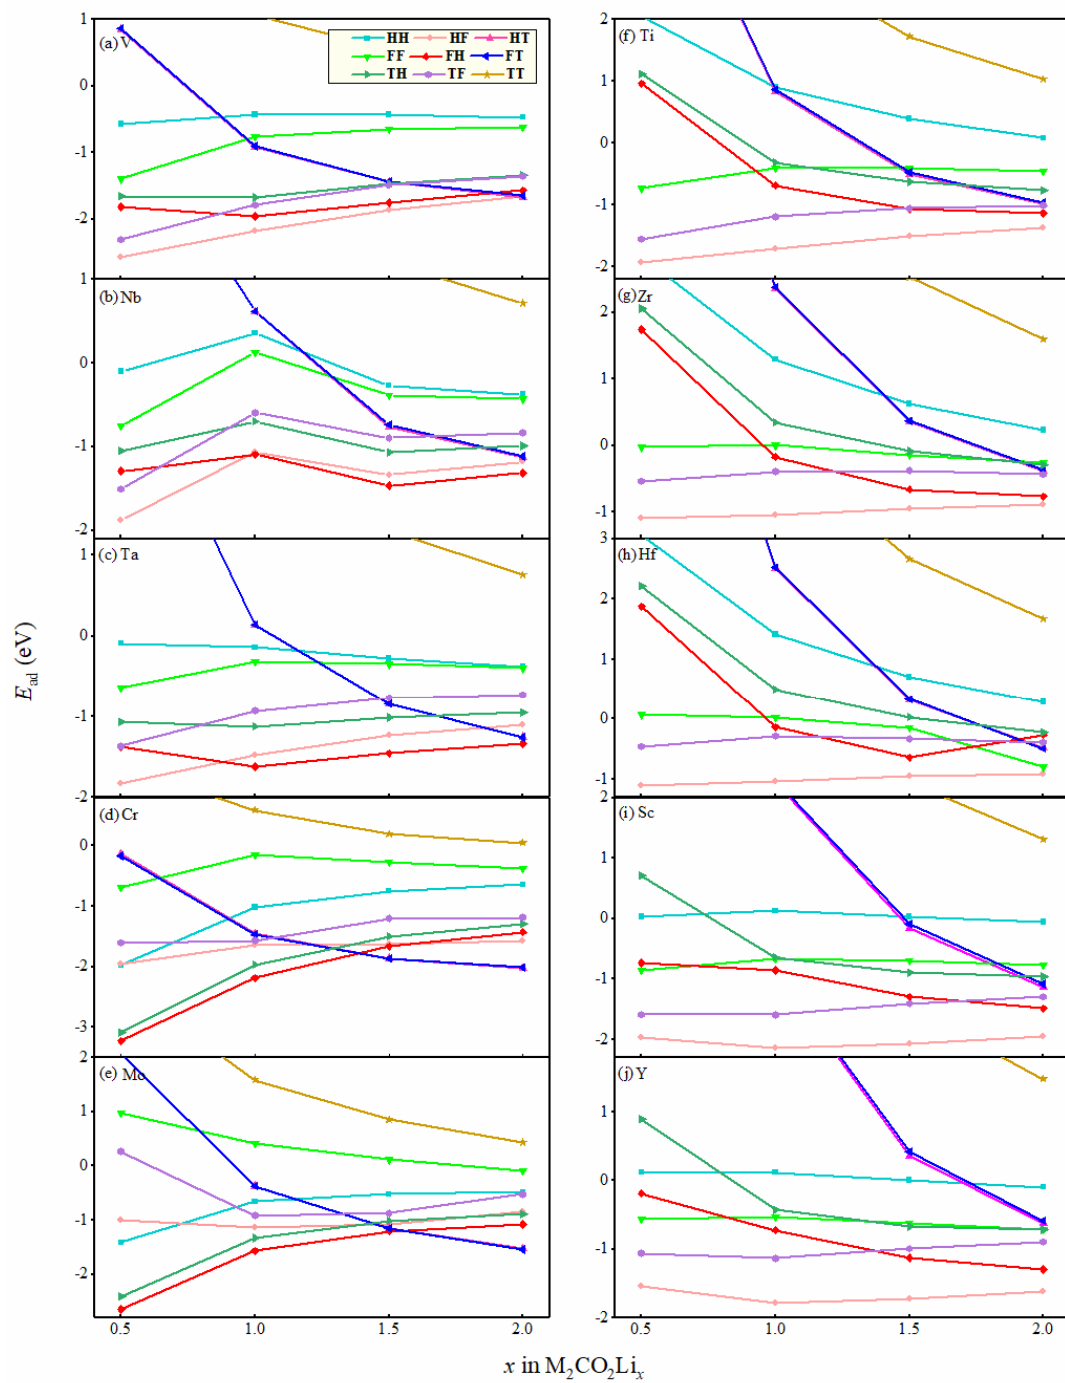

Fig. S2. Adsorption energies of different  $M_2CO_2Li_x$  configurations with a variable of Li contents ( $x$  values)

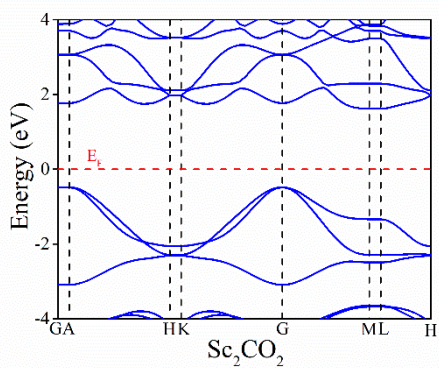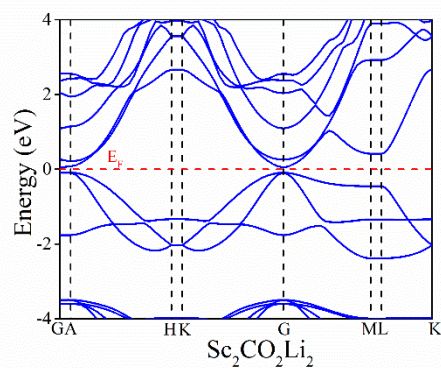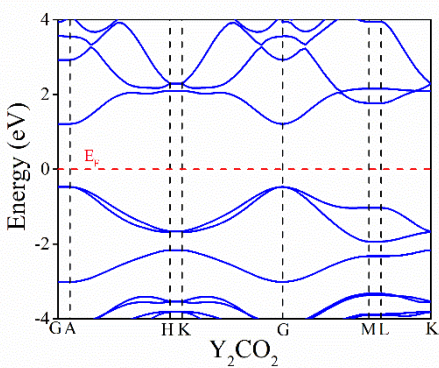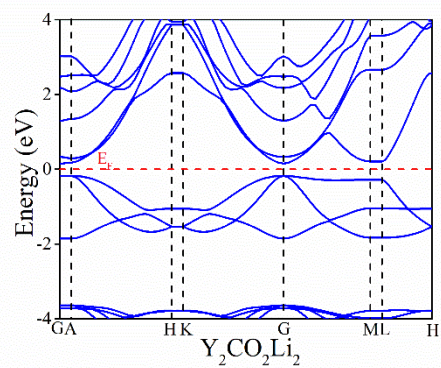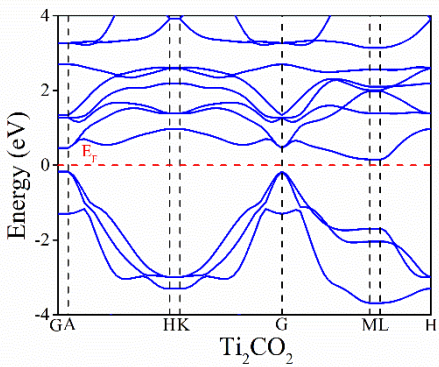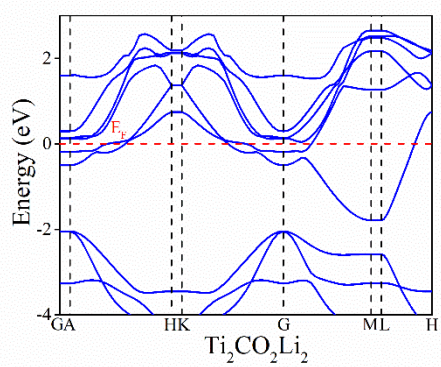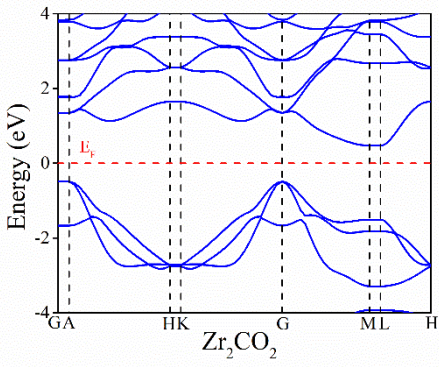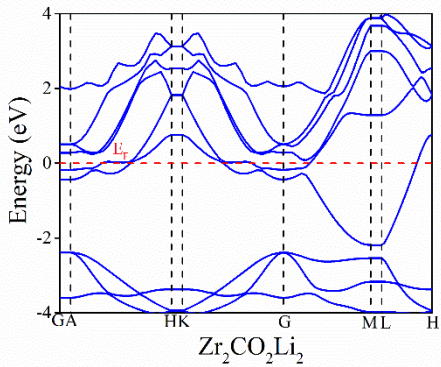



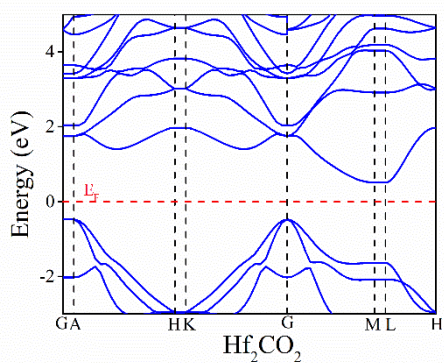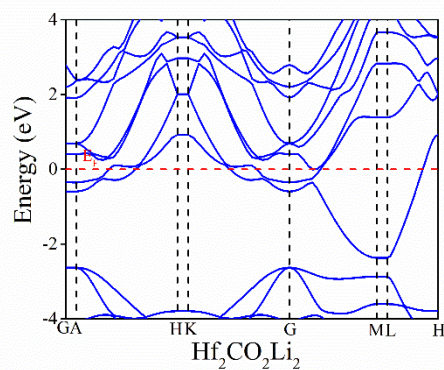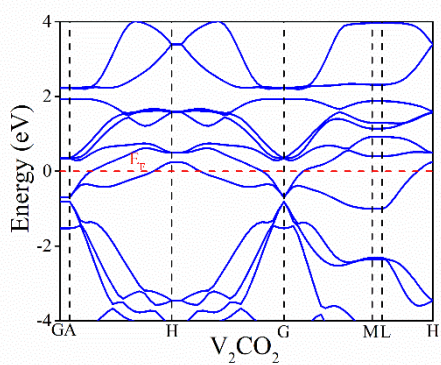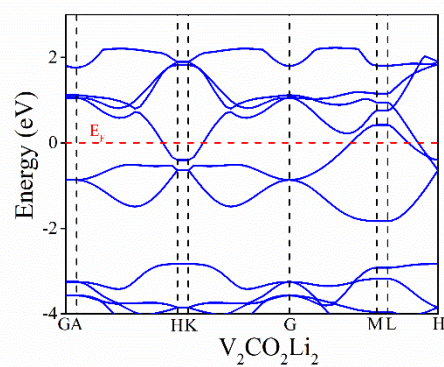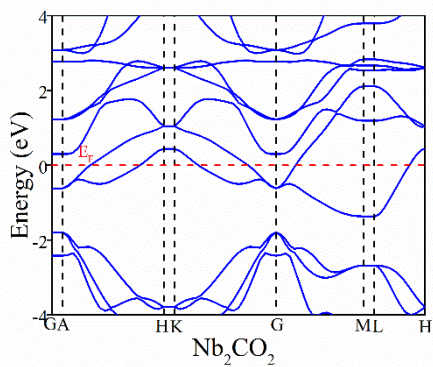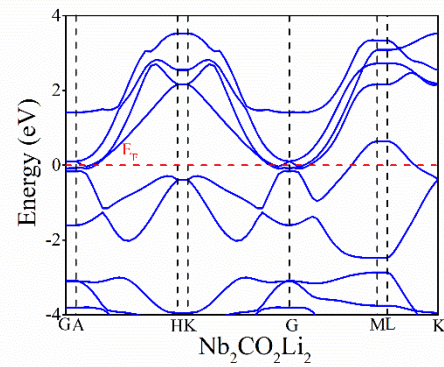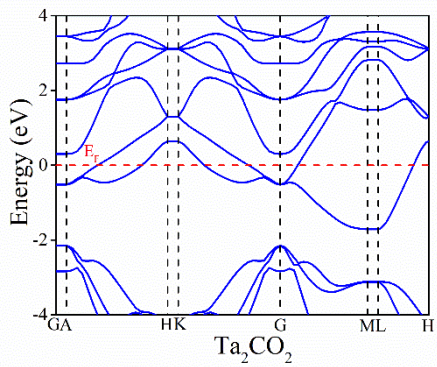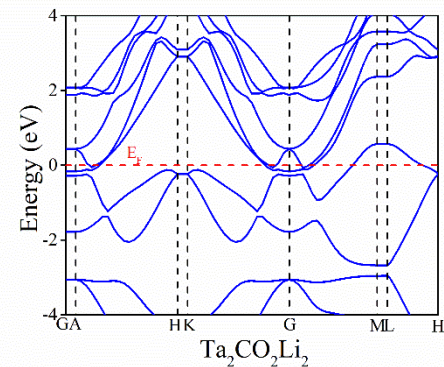

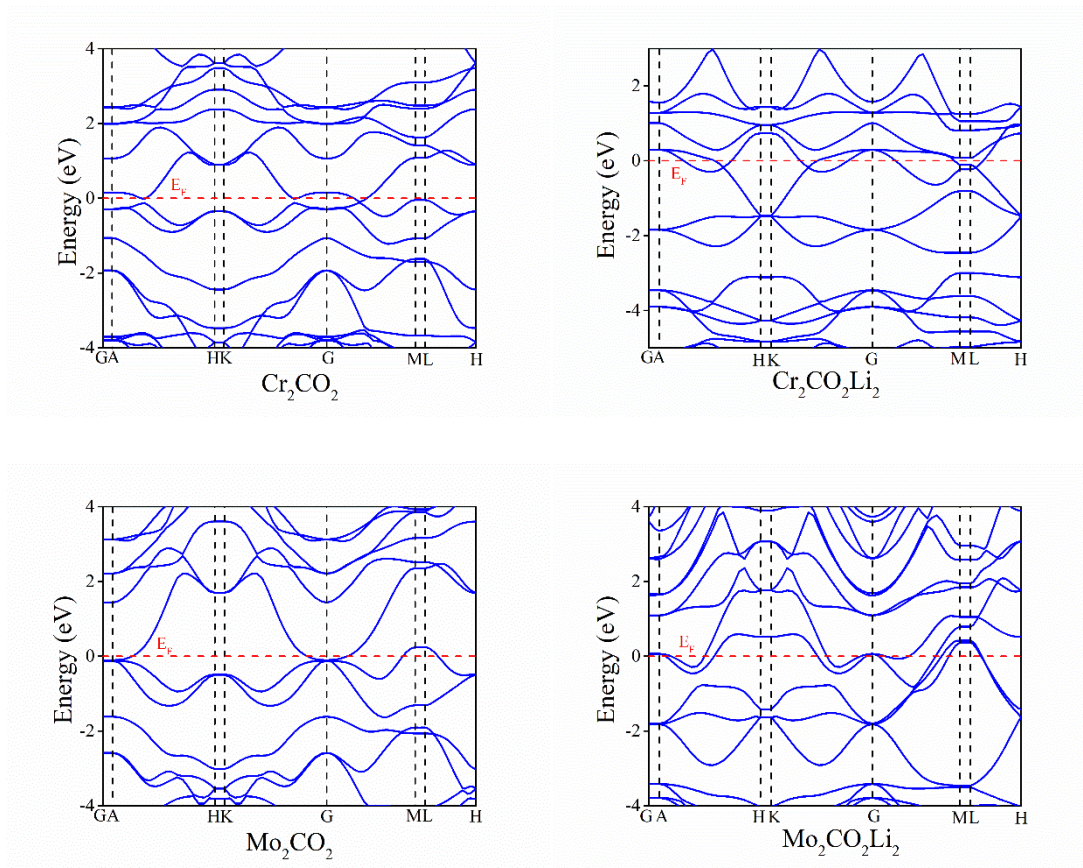

Fig. S3. Band structures of different MXenes before and after lithiation.
